# Supplementary material for: Novel Experimental and Analysis Strategies for Fast Voltammetry: 2. A Troubleshoot-Free Flow Cell for FSCV Calibrations
Source: PubMed Central journal article supplement (PMC10120031; doi:10.1021/acsmeasuresciau.2c00059), 2023-01-11
Supplement: tg2c00059_si_001.pdf [file tg2c00059_si_001.pdf]

Supporting information for

# **Novel Experimental and Analysis Strategies for Fast Voltammetry:**

## **3. A Troubleshoot-Free Flow Cell for FSCV Calibrations**

Melissa Hexter<sup>1</sup>, Joseph van Batenburg-Sherwood<sup>1</sup> and Parastoo Hashemi<sup>1\*</sup>

<sup>1</sup>Department of Bioengineering, Imperial College London, SW7 2AZ UK

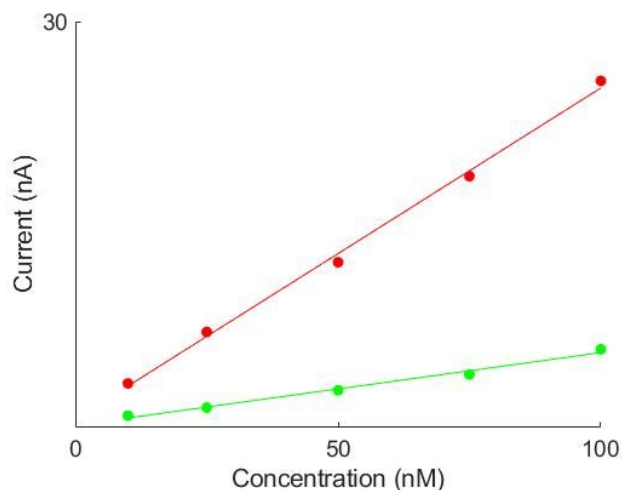

**Figure S1** Calibration curve performed in glutamate only (red) versus glutamate, gamma-aminobutyric acid (GABA), and glycine (green).

The prediction error is low when concentrations are estimated from calibration curves from the same matrix. In contrast, the prediction error is extraordinarily high when the estimated concentrations are from a different matrix from that of the calibration curve. The extraordinary difference (calculated via root mean square error (RMSE)) between the estimated and true values for concentrations in differing matrices can be seen in **Table S1**.

**Table S1**

| matrix    | RMSE (nA) |
|-----------|-----------|
| same      | 0.2877    |
| different | 226       |

**Parts List for Flow Cell:**

| part                                                | quantity (per flow cell) | supplier |
|-----------------------------------------------------|--------------------------|----------|
| Stainless steel standoff, Male-Female, 40 mm, 46 mm | 6                        | Farnell  |
| M3 dome nuts                                        | 3                        | Accu     |
| M3 x 8mm thumb screws                               | 3                        | Accu     |
| M3 x 6mm countersunk screw                          | 3                        | Accu     |
| ¼-28 hex nut                                        | 1                        | Zoro     |
